# Supplementary material for: COVID-19-Related Factors Associated with Sleep Disturbance and Suicidal Thoughts among the Taiwanese Public: A Facebook Survey
Source: MDPI journal article supplement (doi:10.3390/ijerph17124479), 2020-06-22
Supplement: s1 [file s1]

**Table S1:** Sleep disturbance and suicidal thoughts

|                                                                                                                        |
|------------------------------------------------------------------------------------------------------------------------|
| The sleep disturbance of participants was assessed with the question: “In the past week, did you have sleep problems?” |
| Suicidal thoughts were evaluated by the question: “In the past week, did you ever have suicidal thoughts?”             |

**Table S2.** Worry about COVID-19

|                                                                                                                                                                                                             |
|-------------------------------------------------------------------------------------------------------------------------------------------------------------------------------------------------------------|
| The first question was “If you were to develop flu-like symptoms tomorrow, would you be...” with the response ranging from 0 (not at all worried) to 6 (extremely worried).                                 |
| The second question was “In the past one week, have you ever worried about catching COVID-19?” with the response ranging from 1 (no, never think about it) to 5 (worried about it all the time).            |
| The third question was “Please rate the current level of your worry towards COVID-19”; the score of this item ranged from 1 (very mild) to 10 (very severe).                                                |
| The fourth question was “How likely do you think it is that you will contract COVID-19?” with the response ranging from 0 (never) to 6 (certain).                                                           |
| The fifth question was “What do you think are your chances of getting COVID-19 over the next 1 month compared to others outside your family?” with the response ranging from 1 (not at all) to 7 (certain). |

**Table S3.** Impact of the COVID-19 pandemic on participants’ daily lives.

| <b>These questions were as following:</b>  |
|--------------------------------------------|
| In the past week, did you                  |
| 1) avoid going to crowded places           |
| 2) keep good indoor ventilation            |
| 3) clean or disinfect the house more often |
| 4) wash your hands more often              |
| 5) wear a mask more often                  |
| 6) search for information on COVID-19      |
| 7) miss reservations at clinics?           |

**Table S4.** Impact of the COVID-19 pandemic on social interaction.

| <b>The questions included:</b>                                                      |
|-------------------------------------------------------------------------------------|
| In the past week, did you reduce the frequency of your social interaction with your |
| 1) neighborhood,                                                                    |
| 2) family,                                                                          |
| 3) friends, and                                                                     |
| 4) colleagues or classmates?                                                        |

**Table S5.** Academic/occupational interference by the COVID-19 pandemic.

| <b>The question was as following:</b>                                                                 |
|-------------------------------------------------------------------------------------------------------|
| In the past week, did the COVID-19 pandemic interfere with your academic or occupational performance? |

**Table S6.** Perceived social support and COVID-19-specified support.

|                                                                                                     |
|-----------------------------------------------------------------------------------------------------|
| <b>For social support, the questions were as following:</b>                                         |
| In the past week were you satisfied with the support you received from your                         |
| 1) family members                                                                                   |
| 2) friends                                                                                          |
| 3) colleagues or classmates?                                                                        |
| <b>For COVID-19 specific support, the questions were as following:</b>                              |
| During the COVID-19 pandemic, did you get enough resources or support with regard to the following: |
| 1) basic equipment for daily lives, such as masks or hand sanitizer                                 |
| 2) information about infection control                                                              |
| 3) financial support                                                                                |
| 4) medical resources                                                                                |
| 5) mental support?                                                                                  |

**Table S7.** Self-reported physical health.

|                                                                                                |
|------------------------------------------------------------------------------------------------|
| <b>The two questions were as following:</b>                                                    |
| 1. How is your physical health state compared with other people in the past week?              |
| 2. How was your physical health state compared with other people before the COVID-19 pandemic? |
